# Supplementary material for: Robustness of the Dorsal morphogen gradient with respect to morphogen dosage
Source: bioRxiv or medRxiv preprint supplement (doi:10.1101/739292), 2019-09-05
Supplement: Supplementary file [file media-1.pdf]

1 Detailed computational model

2 Previous models of the DI nuclear gradient can be classified in terms of their complexity and the number  
 3 of realistic features they support. In 2009, Kanodia et al. published pioneering modeling work on the DI  
 4 gradient, which captured the establishment of DI gradient by an interaction between DI, Cact and Toll in  
 5 the cytoplasm. It was found that this model was inconsistent with the data from live measurements of  
 6 Venus-tagged DI. The only way to work around this inconsistency was to assume the presence of nuclear  
 7 Cact, thus nuclear DI/Cact. The following model equations represents the full model for the DI system,  
 8 which consists of three species namely, DI, Cact and DI/Cact complex that are allowed to move between  
 9 cytoplasmic compartments and between nucleus and cytoplasm within a cell.

$$\frac{d[V_{nuc}C_{d,nuc}^h]}{dt} = A_{nuc}(k_{in,d}C_{d,cyt}^h - k_{out,d}C_{d,nuc}^h) - V_{nuc}(k_b C_{d,nuc}^h C_{c,nuc}^h) \quad (1)$$

$$\begin{aligned} \frac{d[V_{cyt}C_{d,cyt}^h]}{dt} = & A_{cyt}\Gamma_d(C_{d,cyt}^{h-1} - 2C_{d,cyt}^h + C_{d,cyt}^{h+1}) + V_{cyt}\left(\frac{k_d(x)C_{dc,cyt}^h}{\kappa + C_{dc,cyt}^h} \right. \\ & \left. - k_b C_{d,cyt}^h C_{c,cyt}^h\right) - A_{nuc}(k_{in,d}C_{d,cyt}^h - k_{out,d}C_{d,nuc}^h) \end{aligned} \quad (2)$$

$$\frac{d[V_{nuc}C_{dc,nuc}^h]}{dt} = A_{nuc}(k_{in,dc}C_{dc,cyt}^h - k_{out,dc}C_{dc,nuc}^h) + V_{nuc}(k_b C_{d,nuc}^h C_{c,nuc}^h) \quad (3)$$

$$\begin{aligned} \frac{d[V_{cyt}C_{dc,cyt}^h]}{dt} = & A_{cyt}\Gamma_{dc}(C_{dc,cyt}^{h-1} - 2C_{dc,cyt}^h + C_{dc,cyt}^{h+1}) - V_{cyt}\left(\frac{k_d(x)C_{dc,cyt}^h}{\kappa + C_{dc,cyt}^h} \right. \\ & \left. - k_b C_{d,cyt}^h C_{c,cyt}^h\right) - A_{nuc}(k_{in,dc}C_{dc,cyt}^h - k_{out,dc}C_{dc,nuc}^h) \end{aligned} \quad (4)$$

$$\frac{d[V_{nuc}C_{c,nuc}^h]}{dt} = A_{nuc}(k_{in,c}C_{c,cyt}^h - k_{out,c}C_{c,nuc}^h) - V_{nuc}(k_b C_{d,nuc}^h C_{c,nuc}^h) \quad (5)$$

$$\begin{aligned} \frac{d[V_{cyt}C_{c,cyt}^h]}{dt} = & A_{cyt}\Gamma_c(C_{c,cyt}^{h-1} - 2C_{c,cyt}^h + C_{c,cyt}^{h+1}) + V_{cyt}\left(\frac{k_d(x)C_{dc,cyt}^h}{\kappa + C_{dc,cyt}^h} - k_bC_{d,cyt}^hC_{c,cyt}^h \right. \\ & \left. - k_{deg}C_{c,cyt}^h\right) - A_{nuc}(k_{in,c}C_{c,cyt}^h - k_{out,c}C_{c,nuc}^h) + P_c \end{aligned} \quad (6)$$

10 Here, subscripts *nuc* and *cyt* represent nucleus and cytoplasm respectively; *d*, *c*, and *dc* represent species  
 11 DI, Cact, and DI/Cact complex respectively; superscript *h* represents a nucleus and its associated  
 12 cytoplasmic compartment. The parameters,  $k_{in,species}$  and  $k_{out,species}$  represents nuclear import and  
 13 export rates,  $k_b$  represents DI/Cact binding constant,  $\Gamma_{species}$  represents intercompartmental exchange  
 14 rates,  $k_d(x) = k_d^{max} \exp\left(\frac{x}{\phi}\right)^2$  represents the gaussian Toll-mediated rate constant and  $\kappa$  represents  
 15 the Michaelis Menten constant for the dissociation of DI/Cact complex,  $k_{deg}$  represents the degradation  
 16 rate constant for Cact and  $P_c$  represents rate of production of Cact.

17 The DI system is represented by 6 equations consisting of DI, Cact and DI/Cact in the nucleus and in the  
 18 cytoplasm. This model is based on previous models used in the literature with some modifications. Firstly,  
 19 Cact and the DI/Cact complex were allowed to enter the nucleus and secondly Michaelis Menten kinetics  
 20 was used to describe the dissociation of the DI/Cact complex by Toll in the cytoplasm. The width of Toll  
 21 gradient was fixed at  $\phi = 0.15$ , which approximates the width of wildtype DI gradients. In order to  
 22 minimally describe the effect of dosage of the DI morphogen on the embryo's development these  
 23 equations were simplified based on the following assumptions. Firstly, since the time scales of transport  
 24 of species between adjacent cytoplasmic compartments is much higher than that of nuclear exchange, a  
 25 state of pseudo equilibrium is assumed between the nucleus and cytoplasm. Thus,  $k_{out}C_{nuc} \approx k_{in}C_{cyt}$  or  
 26  $C_{nuc} \approx K_{eq}C_{cyt}$  where,  $K_{eq} \equiv k_{in}/k_{out}$  is defined as the equilibrium constant for nuclear  
 27 import/export. The values for the equilibrium constants are fixed at  $K_{eq,d} = 4$ ,  $K_{eq,dc} = 1$  and  $K_{eq,c} =$   
 28 1 (1). Secondly, since Cact has a high turnover rate, a uniform concentration of Cact, equal to that at the  
 29 beginning of nuclear cycle 14 in wildtype embryos, was assumed. Shown below are equations where

30 concentrations have been non-dimensionalized using conditions at the beginning of nuclear cycle 14 in  
 31 wildtype embryos.

$$\begin{aligned} & \frac{d[(V_{nuc}K_{eq,d} + V_{cyt})u^h]}{dT} \\ &= \Gamma_d A_{cyt}(u^{h-1} - 2u^h + u^{h+1}) + V_{cyt} \left( \frac{\beta(x)w^h}{\kappa + C_d^{wt}w^h} - k_b C_d^{wt} C_c^{wt} u^h v^h \right) \\ & \quad - V_{nuc}(k_b K_{eq,d} K_{eq,c} C_d^{wt} C_c^{wt} u^h v^h) \end{aligned} \quad (7)$$

$$\begin{aligned} & \frac{d[(V_{nuc}K_{eq,dc} + V_{cyt})w^h]}{dT} \\ &= \Gamma_{dc} A_{cyt}(w^{h-1} - 2w^h + w^{h+1}) - V_{cyt} \left( \frac{\beta(x)w^h}{\kappa + C_d^{wt}w^h} - k_b C_c^{wt} u^h v^h \right) \\ & \quad + V_{nuc}(k_b K_{eq,d} K_{eq,c} C_c^{wt} u^h v^h) \end{aligned} \quad (8)$$

$$\begin{aligned} & \frac{d[(V_{nuc}K_{eq,c} + V_{cyt})v^h]}{dT} \\ &= \Gamma_c A_{cyt}(v^{h-1} - 2v^h + v^{h+1}) \\ & \quad - \frac{V_{cyt}}{C_c^{wt}} \left( \frac{\beta(x)C_d^{wt}w^h}{\kappa + C_d^{wt}w^h} - k_b C_d^{wt} C_c^{wt} u^h v^h - k_{deg} C_c^{wt} v^h \right) \\ & \quad + \frac{V_{cyt}}{C_c^{wt}} (k_b K_{eq,d} K_{eq,c} C_d^{wt} C_c^{wt} u^h v^h) + \frac{P_c}{C_c^{wt}} \end{aligned} \quad (9)$$

32 where,

$$33 \quad u^h = \frac{C_{d,cyt}^h}{C_d^{wt}} \quad w^h = \frac{C_{dc,cyt}^{wt}}{C_d^{wt}} \quad v^h = \frac{C_{c,cyt}^h}{C_c^{wt}} \quad C_c^{wt} = \frac{P_c}{k_{deg}}$$

34 Due to the high turnover rate of Cact, equation 9, upon non-dimensionalizing simplifies to  $v^h = 1$ .  
 35 Finally, the equations in the main text were derived by non-dimensionalizing equations 7 and 8 using the  
 36 following dimensionless parameters.

$$37 \quad \tilde{V}_{cyt} = \frac{V_{cyt}}{V_{14}} \quad \tilde{A}_{cyt} = \frac{A_{cyt}}{A_{14}} \quad \gamma = -k_b C_c^o \bar{T} \quad \beta = k_d^{max} \bar{T} \quad \lambda_d = \frac{A_{nuc}^{14} \Gamma_d T}{V_{nuc}^{14}} \quad \lambda_{dc} = \frac{A_{nuc}^{14} \Gamma_{dc} T}{V_{nuc}^{14}}$$

38 Thus, based on the two assumptions, the full six equation model was reduced to the two-equation model  
39 as shown in the main text.

40 Least squares method for determining robustness in the model

41 The error in the predictions of boundaries of gene expression was defined, for every border, as follows,

$$\begin{aligned} e_{\beta}(\theta) &= (\varepsilon_{\beta,1x})^2 + (\varepsilon_{\beta,2x})^2 + (\varepsilon_{\beta,4x})^2 \\ &= \left( \frac{x_{\beta,model,1x}(\theta) - x_{\beta,exp,1x}}{\sigma_{\beta,exp,1x}} \right)^2 + \left( \frac{x_{\beta,model,2x}(\theta) - x_{\beta,exp,2x}}{\sigma_{\beta,exp,2x}} \right)^2 \\ &\quad + \left( \frac{x_{\beta,model,4x}(\theta) - x_{\beta,exp,4x}}{\sigma_{\beta,exp,4x}} \right)^2 \end{aligned} \tag{10}$$

42 where,  $x_{\beta,model,g}$  is the model boundary prediction,  $x_{\beta,exp,g}$  is the experimental measure of border and  
43  $\sigma_{\beta,exp,g}$  is the experimentally observed variation in boundary of gene  $\beta$  of genotype  $g$ .

44 For any gene expression border  $\beta \in B$ , where  $B = \{sna, sogd, sogv\}$  and genotype  $g \in G$  where  $G = \{1x,$   
45  $2x, 4x\}$ , the error is calculated by minimizing  $e_{\beta}(\theta)$  with respect to its concentration threshold  $\theta$ . Those  
46 parameter sets with error values less than 1.5 for all gene expression boundaries, were deemed robust.

47

48 Approximate gradient width for dl 1x gradients

49 As the DL gradient in embryos from mothers heterozygous for *dl* is not Gaussian-shaped, fitting it to a  
50 Gaussian gives an aberrant value for  $\sigma$ . To attempt to characterize the flat-topped gradients by a value of  
51  $\sigma$  equivalent to its closest approximation to a wildtype gradient, we did the following. First, by averaging  
52 ~75 DL gradients from 1x embryos, we created a “canonical” flat-topped gradient, normalized between  
53 zero and one, denoted  $f_{50}(x)$ . Next, we fit each 1x DL gradient to this canonical gradient by allowing the

54 spatial coordinate to be stretched (see Carrell et al., 2017; Liberman et al., 2009; Trisnadi et al., 2013 for  
 55 examples). Therefore, for each 1x embryo  $i$ , we obtained a best-fit value of the spatial stretching factor,  
 56  $\delta_i$ .

57 Next, we calculated the area under the curve of a wt Gaussian:

$$I_{100} = \int_0^1 \exp\left(-\frac{x^2}{2\sigma^2}\right) dx \approx \int_0^\infty \exp\left(-\frac{x^2}{2\sigma^2}\right) dx = \sigma\sqrt{2} \int_0^\infty \exp(-z^2) dz = \sigma\sqrt{\frac{\pi}{2}} \quad (10)$$

58  
 59 where  $z = x/(\sigma\sqrt{2})$ , and the change of the upper limit of integration to  $\infty$  is valid because  $\sigma \leq 0.3$ . The  
 60 average width of the wildtype gradient is  $\sigma_{wt} = 0.152$ , which implies  $I_{100} = 0.1880$ .

61 Next, we calculated the area under the curve of  $f_{50}(x)$ , which was  $I_{50} = 0.2438$ . Next, we computed the  
 62 value of  $\alpha_{50}$  makes  $\alpha_{50}I_{50} = 0.5I_{100}$ , and found that  $\alpha_{50} = 0.3855$ . Finally, to calculate the equivalent  
 63 Gaussian-like width of the 1x DI gradients, we computed the value of sigma that minimizes the following:

$$\varepsilon = \int_{x_1}^{x_2} [f_{100}(x; \sigma) - \alpha_{50}f_{50}(x)]^2 dx \quad (11)$$

64 This value of  $\sigma$ , which we will call  $\sigma_{1x}^{eff}$  is 0.1283. In other words, if the average 1x embryo has 50% of the  
 65 DI in an average wildtype embryo, then the DI gradient in an average 1x embryo looks most like a wildtype  
 66 gradient with a width of 0.1283 (slightly narrower than the average wildtype gradient). Taking this base  
 67 value of  $\sigma_{1x}^{eff}$ , we can find the effective gradient width for each embryo  $i$  by multiplying by  $\delta_i$ .

68  
 69 Least squares calculations for thresholds and amplitudes in the empirical description

70 To estimate the necessary amplitude of the 1x and 4x canonical curves, with respect to wt, in order to  
 71 achieve the observed gene expression (and given the observed shape and width of the DI gradient), we

72 constructed a least squares estimation. Let the objective function  $f$  be the sum of the squares of error  
 73 between the (empirical) DI gradient at the locations of a given gene expression boundary and the  
 74 estimated threshold for that gene:

$$f(\boldsymbol{\alpha}, \boldsymbol{\theta}, \mathbf{X}, \mathbf{S}) = \sum_{g \in G} \sum_{\beta \in B} (\varepsilon_{\beta,g})^2 = \sum_{g \in G} \sum_{\beta \in B} \left( \frac{\alpha_g D l_g(x_{\beta,g}, \sigma_g) - \theta_{\beta}}{s_{\beta,g}} \right)^2 \quad (12)$$

75  
 76 ...where the vector  $\boldsymbol{\alpha} = [\alpha_{1x}, \alpha_{2x}, \alpha_{4x}]$ , the vector  $\boldsymbol{\theta} = [\theta_{sna}, \theta_{sogv}, \theta_{sogd}]$ , the set of genotypes is  $G =$   
 77  $\{1x, 2x, 4x\}$ , the set of boundaries is  $B = \{sna, sogv, sogd\}$ , and  $x_{\beta,g}$  is the boundary location and  $s_{\beta,g}$  is a  
 78 measure of the variability for that genotype and boundary. In addition, the position array  $\mathbf{X}$  and standard  
 79 error array  $\mathbf{S}$  are:

80

$$\mathbf{X} = \begin{bmatrix} x_{sna,1x} & x_{sna,2x} & x_{sna,4x} \\ x_{sogv,1x} & x_{sogv,2x} & x_{sogv,4x} \\ x_{sogd,1x} & x_{sogd,2x} & x_{sogd,4x} \end{bmatrix} \quad (13)$$

81

$$\mathbf{S} = \begin{bmatrix} s_{sna,1x} & s_{sna,2x} & s_{sna,4x} \\ s_{sogv,1x} & s_{sogv,2x} & s_{sogv,4x} \\ s_{sogd,1x} & s_{sogd,2x} & s_{sogd,4x} \end{bmatrix} \quad (14)$$

82 This can also be written more transparently as:

$$f(\boldsymbol{\alpha}, \boldsymbol{\theta}, data) = \sum_{\beta \in B} (\varepsilon_{\beta,1x})^2 + (\varepsilon_{\beta,2x})^2 + (\varepsilon_{\beta,4x})^2 \quad (15)$$

$$= \sum_{\beta \in B} \left( \frac{\alpha_{1x} D l_{1x}(x_{\beta,1x}, \sigma_{1x}) - \theta_{\beta}}{s_{\beta,1x}} \right)^2 + \left( \frac{D l_{wt}(x_{\beta,2x}, \sigma_{2x}) - \theta_{\beta}}{s_{\beta,2x}} \right)^2$$

$$+ \left( \frac{\alpha_{4x} D l_{wt}(x_{\beta,4x}, \sigma_{4x}) - \theta_{\beta}}{s_{\beta,4x}} \right)^2$$

83

84 This function can be minimized by least squares, with respect to varying  $\alpha_{1x}, \alpha_{4x}, \theta_{sna}, \theta_{sogv}, \theta_{sogd}$ .

85

## 86 References

87 1. O’Connell MD, Reeves GT. The presence of nuclear cactus in the early drosophila embryo may  
 88 extend the dynamic range of the dorsal gradient. Baker RE, editor. PLoS Comput Biol [Internet].  
 89 2015 Apr 16 [cited 2018 Jan 11];11(4):e1004159. Available from:  
 90 <http://dx.plos.org/10.1371/journal.pcbi.1004159>

91 2. Liberman LM, Reeves GT, Stathopoulos A. Quantitative imaging of the Dorsal nuclear gradient  
 92 reveals limitations to threshold-dependent patterning in Drosophila. Proc Natl Acad Sci U S A  
 93 [Internet]. 2009 Dec 29 [cited 2018 Jan 11];106(52):22317–22. Available from:  
 94 <http://www.ncbi.nlm.nih.gov/pubmed/20018754>

95 3. Trisnadi N, Altinok A, Stathopoulos A, Reeves GT. Image analysis and empirical modeling of gene  
 96 and protein expression. Methods [Internet]. 2013 Jul 15 [cited 2018 Jul 16];62(1):68–78. Available  
 97 from: <https://www.sciencedirect.com/science/article/pii/S1046202312002629?via%3Dihub>

98 4. Carrell SN, O’Connell MD, Jacobsen T, Pomeroy AE, Hayes SM, Reeves GT. A facilitated diffusion  
 99 mechanism establishes the Drosophila Dorsal gradient. Development [Internet]. 2017 [cited 2018  
 100 Mar 6];144(23):4450–61. Available from:

101 <http://dev.biologists.org/content/develop/144/23/4450.full.pdf>

102

103



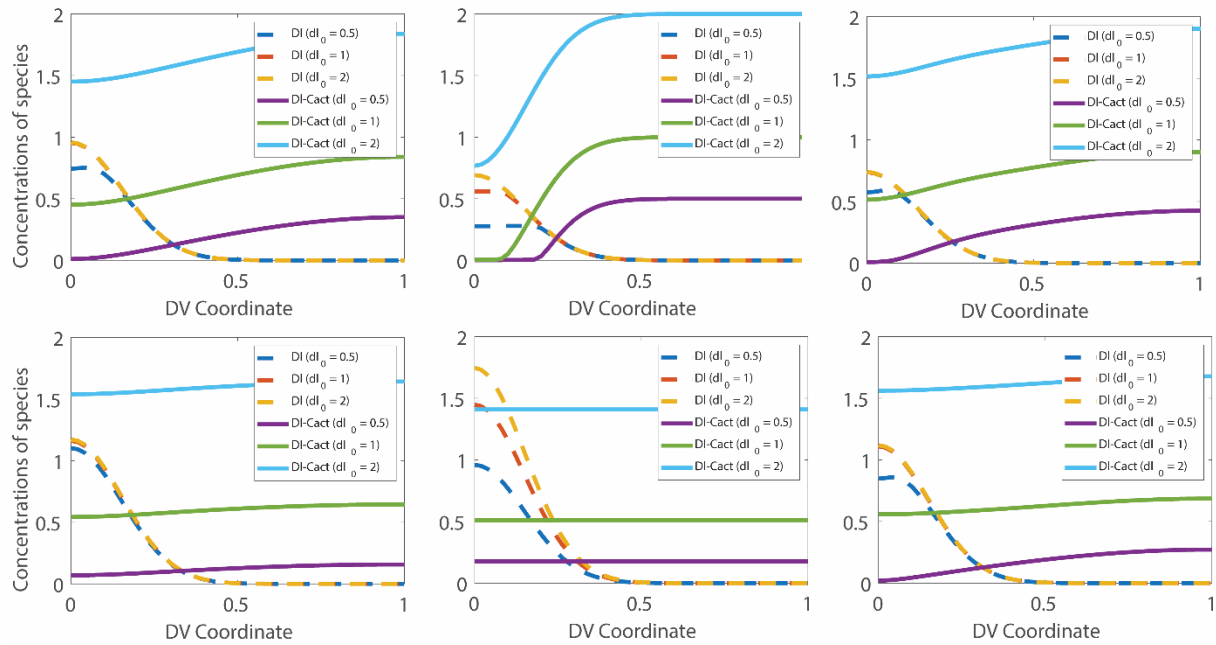

104

105 **Figure S1.** Concentration profiles of free DI and DI/Cact (robust parameters). This figure shows  
 106 concentration profiles of free DI & DI/Cact, for parameter sets that were accepted as robust. The plots  
 107 show non-zero concentration for DI/Cact complexes at the dorsal midline at  $x = 1$ .

108

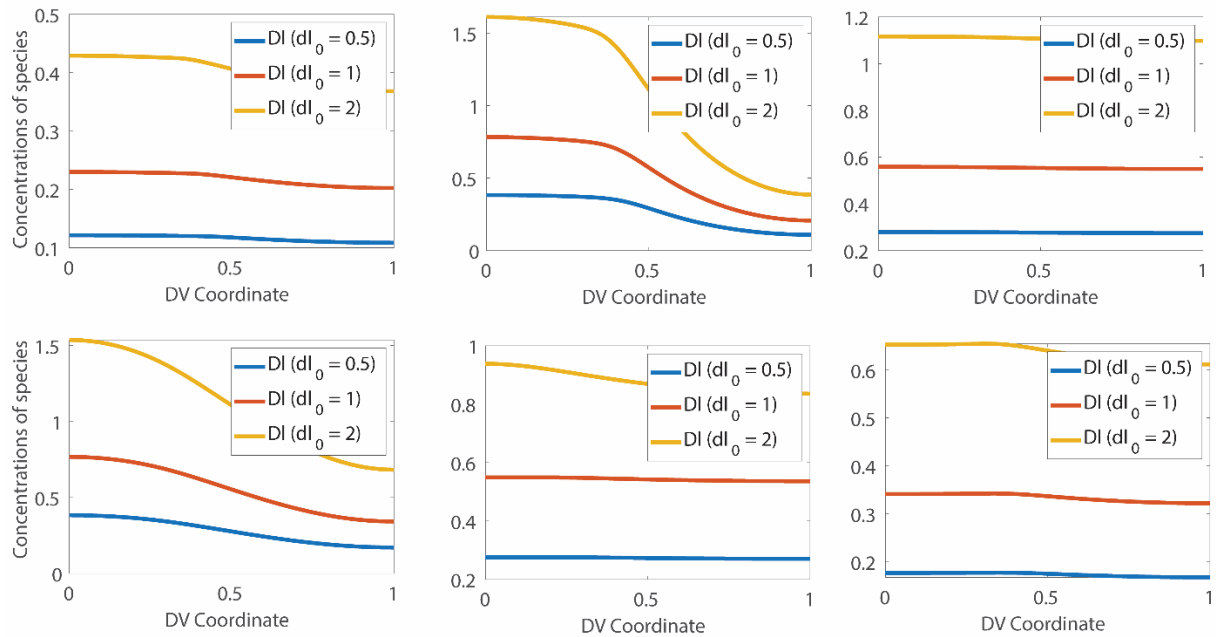

109

110 **Figure S2.** Concentration profiles of free DI (non-robust parameters). This figure shows concentration

111 profiles of free DI, for parameter sets, that were rejected as not robust. In most cases, concentration

112 curves do not decay to zero at the dorsal midline.

113
